# Supplementary material for: Misregulation of Alternative Splicing in a Mouse Model of Rett Syndrome
Source: PLoS Genet. 2016 Jun 28;12(6):e1006129. doi: 10.1371/journal.pgen.1006129 (PMC4924826; doi:10.1371/journal.pgen.1006129)
Supplement: S4 Table — (XLSX) [file pgen.1006129.s013.xlsx]

## Sheet: Sheet1
Datasets	filter	Number of events
Our study and Chen et al 2015 PNAS	Direction of change is the same, |ΔPSI|>=5%, BF>=1	150
Our study and Gabel et al 2015 Nature	Direction of change is the same, |ΔPSI|>=5%, BF>=1	171
